# Supplementary material for: Integrative Physiological and Transcriptome Analysis Reveals the Mechanism of Cd Tolerance in Sinapis alba
Source: MDPI journal article supplement (doi:10.3390/genes14122224), 2023-12-16
Supplement: s1 [file s1]

**Table S2. Primers used in experiment of gene expression by qRT-PCR**

| Gene id             | Forward primer       | Reverse primer       |
|---------------------|----------------------|----------------------|
| <i>actin</i>        | ACTAACTGCCTTGCTCCACT | AGCAGTGATAGAGTGGACGG |
| <i>Sal07g18790L</i> | CTGGTTCTCTTTGTGGCCGA | GTGGGGTTTGGGAATCTGGA |
| <i>Sal11g11670L</i> | ATACCGCCGCAACTTCTTCT | TAAGTCCTTGACGGCACGAG |
| <i>Sal06g27530L</i> | TACATGACCGTTGGATCGCC | CTCGCACGAAACACGTCAAG |
| <i>Sal10g28460L</i> | GTGTTGCGGGTGAGACTGTA | TTTCCACAGCAGCGAGTCAT |
| <i>Sal09g10150L</i> | AGTGGAGCACGCAAAGACAT | GAACACAACGCCAACAGTCC |
| <i>Sal10g18260L</i> | TCTCGCTAACCCTCGCATTC | CTGTGGTGGTTTTGGTTGGC |
| <i>Sal11g35960L</i> | CGTGGTATTGGTCGCGGATA | CTTCCCCCTCTTCTACACGC |
| <i>Sal05g23740L</i> | AGCCTTTCTGGATGCGACAA | CTCAAGCGGTTCCGAGACAT |
| <i>Sal07g08470L</i> | GGGAACTGGCCTTACAGAGG | AACTCCGGTGACAGAGCCTA |
| <i>Sal05g27590L</i> | AGCTCAAACCCACGAGCATT | ACTCCTGCAAAGAGGACGTG |
