# Supplementary material for: Integrative Physiological and Transcriptome Analysis Reveals the Mechanism of Cd Tolerance in Sinapis alba
Source: MDPI journal article supplement (doi:10.3390/genes14122224), 2023-12-16
Supplement: s1 [file s1]

**Table. S6 Phenylpropanoid biosynthesis**

| <b>KEGG</b>       | <b>ID</b>           | <b>Symbol</b>                    | <b>transcript id</b> | <b>log2(fold change)<br/>CKs vs. Cds</b> | <b>log2(fold change)<br/>CKr vs. Cdr</b> |
|-------------------|---------------------|----------------------------------|----------------------|------------------------------------------|------------------------------------------|
| Cinnamoyl-CoA     | <i>Sal02g36790L</i> | HCT                              | AT5G48930.1          | 0.113068792                              | 0.018237949                              |
|                   | <i>Sal06g23960L</i> | DCF                              | AT3G48720.1          | -0.244067217                             | -0.027699621                             |
| Coniferyl alcohol | <i>Sal01g06920L</i> | EDA28,<br>MEE23,<br>AtBBE-like15 | AT2G34790.1          | 0.485216119                              | -0.127746262                             |
|                   | <i>Sal04g20680L</i> | UGT72E1                          | AT3G50740.1          | -0.205431936                             | -0.337378813                             |
|                   | <i>Sal04g25500L</i> | AtDIR6, DIR6                     | AT4G23690.1          | 0.053372702                              | -0.39603638                              |
|                   | <i>Sal05g11550L</i> | AtPCBER1,<br>PCBER1              | AT4G39230.1          | 0.136355399                              | 0.01044705                               |
|                   | <i>Sal07g18740L</i> | EDA28,<br>MEE23,<br>AtBBE-like15 | AT2G34790.1          | 0.168779034                              | -0.300099806                             |
