# Supplementary material for: Integrative Physiological and Transcriptome Analysis Reveals the Mechanism of Cd Tolerance in Sinapis alba
Source: MDPI journal article supplement (doi:10.3390/genes14122224), 2023-12-16
Supplement: s1 [file s1]

**Table. S4. DEGs involved in plant hormone biosynthesis and plant hormone signal transduction in plants**

| KEGG          | ID                  | Symbol | transcript id | log2 (fold change)<br>CKs vs. Cds | log2 (fold change)<br>CKr vs. Cdr |
|---------------|---------------------|--------|---------------|-----------------------------------|-----------------------------------|
| jasmonic acid | <i>Sal01g00730L</i> | JAR1   | AT2G46370.4   | -0.110272738                      | 0.733767659                       |
|               | <i>Sal12g19170L</i> | JAZ7   | AT2G34600.1   | 0.090035997                       | 0.900123927                       |
|               | <i>Sal01g06990L</i> | JAZ7   | AT2G34600.1   | 0.000476011                       | -0.77380942                       |
|               | <i>Sal01g23660L</i> | JAZ10  | AT5G13220.7   | -0.300425257                      | -1.171830343                      |
|               | <i>Sal07g26480L</i> | JAZ1   | AT1G19180.3   | 0.442610178                       | -0.662375018                      |
|               | <i>Sal09g29710L</i> | JAZ6   | AT1G72450.2   | 0.584632003                       | -0.862181821                      |
|               | <i>Sal12g04650L</i> | JAZ10  | AT5G13220.7   | 0.622743459                       | -0.675050199                      |
|               | <i>Sal08g21680L</i> | MYC2   | AT1G32640.1   | 0.115013376                       | -0.645743792                      |
| Auxin         | <i>Sal06g32250L</i> | IAA30  | AT3G62100.2   | 0.082482857                       | 0.679328684                       |
|               | <i>Sal05g06840L</i> | IAA24  | AT1G19850.2   | -0.50498866                       | -1.027462386                      |
|               | <i>Sal05g06840L</i> | ARF5   | AT1G19850.2   | -0.50498866                       | -1.027462386                      |
|               | <i>Sal05g10820L</i> | ARF8   | AT5G37020.3   | -0.568099568                      | -0.594840058                      |
|               | <i>Sal06g32370L</i> | ARF18  | AT3G61830.2   | -0.347862842                      | -0.799949981                      |
|               | <i>Sal07g01170L</i> | ARF11  | AT2G46530.3   | -0.248944525                      | -0.819921083                      |
|               | <i>Sal09g11650L</i> | ARF9   | AT4G23980.2   | 0.062523761                       | -1.488661374                      |
|               | <i>Sal04g26410L</i> | GH3.5  | AT4G27260.1   | -0.109044918                      | 0.736444425                       |
|               | <i>Sal09g08980L</i> | GH3.5  | AT4G27260.1   | -0.214676298                      | 0.63653736                        |
|               | <i>Sal01g23600L</i> | GH3.12 | AT5G13320.3   | 0.154868834                       | -1.384363737                      |
|               | <i>Sal03g02640L</i> | GH3-10 | AT4G03400.2   | 0.091998717                       | -0.587886643                      |
|               | <i>Sal03g24480L</i> | GH3.12 | AT5G13320.3   | 0.021988377                       | -1.497939482                      |
|               | <i>Sal12g04700L</i> | GH3.12 | AT5G13320.3   | 0.273473625                       | -1.787331645                      |
|               | <i>Sal01g00730L</i> | GH3.11 | AT2G46370.4   | -0.110272738                      | 0.733767659                       |
|               | <i>Sal06g13350L</i> | SAUR78 | AT1G72430.1   | -0.100313355                      | 0.763270316                       |
|               | <i>Sal09g03110L</i> | SAUR49 | AT4G34750.2   | -0.139159115                      | 0.778842858                       |
