# Supplementary material for: Integrative Physiological and Transcriptome Analysis Reveals the Mechanism of Cd Tolerance in Sinapis alba
Source: MDPI journal article supplement (doi:10.3390/genes14122224), 2023-12-16
Supplement: s1 [file s1]

**Table S3.** Statistics on the number of up-regulated genes down-regulated genes in CKs *vs.* Cds and CKr *vs.* Cdr

| DEGs | CKs <i>vs.</i> Cds | CKr <i>vs.</i> Cdr |
|------|--------------------|--------------------|
| Up   | 19                 | 137                |
| Down | 18                 | 405                |
