# Supplementary material for: Integrative Physiological and Transcriptome Analysis Reveals the Mechanism of Cd Tolerance in Sinapis alba
Source: MDPI journal article supplement (doi:10.3390/genes14122224), 2023-12-16
Supplement: s1 [file s1]

**Table. S1. Cadmium content of heavy metal after three days of treatment**

| <b>Description of sample</b> | <b>Cadmium content (mg/kg)</b> | <b>Mean value (mg/kg)</b> | <b>Standard error</b> |
|------------------------------|--------------------------------|---------------------------|-----------------------|
| 0 mM Shoots                  | 12.73                          | 12.80                     | 0.34                  |
|                              | 12.41                          |                           |                       |
|                              | 13.24                          |                           |                       |
| 0.25 mM Shoots               | 196.68                         | 203.59                    | 5.20                  |
|                              | 204.85                         |                           |                       |
|                              | 209.23                         |                           |                       |
| 0.5 mM Shoots                | 233.79                         | 233.88                    | 3.68                  |
|                              | 233.71                         |                           |                       |
|                              | 234.15                         |                           |                       |
| 1 mM Shoots                  | 272.16                         | 269.25                    | 2.88                  |
|                              | 265.32                         |                           |                       |
|                              | 270.27                         |                           |                       |
| 0 mM Roots                   | 50.62                          | 49.25                     | 2.25                  |
|                              | 46.08                          |                           |                       |
|                              | 51.05                          |                           |                       |
| 0.25 mM Roots                | 766.88                         | 786.99                    | 21.45                 |
|                              | 764.23                         |                           |                       |
|                              | 829.86                         |                           |                       |
| 0.5 mM Roots                 | 1109.06                        | 1065.29                   | 31.30                 |
|                              | 1049.09                        |                           |                       |
|                              | 1037.72                        |                           |                       |
| 1 mM Roots                   | 1318.42                        | 1275.42                   | 39.75                 |
|                              | 1222.56                        |                           |                       |
|                              | 1285.28                        |                           |                       |
