# Supplementary material for: Integrative Physiological and Transcriptome Analysis Reveals the Mechanism of Cd Tolerance in Sinapis alba
Source: MDPI journal article supplement (doi:10.3390/genes14122224), 2023-12-16
Supplement: s1 [file s1]

**Table S5. Antioxidant enzyme, ABC transporter protein and transcription factor in root and shoot**

| KEGG | ID                  | Symbol  | transcript id | log2(fold change)<br>CKs vs. Cds | log2(fold change)<br>CKr vs. Cdr |
|------|---------------------|---------|---------------|----------------------------------|----------------------------------|
| WRKY | <i>Sal03g24270L</i> | WRKY75  | AT5G13080.1   | 0.361191997                      | -0.685158282                     |
|      | <i>Sal04g33120L</i> | WRKY13  | AT4G39410.1   | -0.268202227                     | -0.778625606                     |
|      | <i>Sal06g32430L</i> | WRKY46  | AT2G46400.1   | 0.163911732                      | -0.809475739                     |
|      | <i>Sal07g01310L</i> | WRKY46  | AT2G46400.1   | 0.076532655                      | -0.628780158                     |
|      | <i>Sal09g00400L</i> | WRKY13  | AT4G39410.1   | -0.226867627                     | -0.670501622                     |
|      | <i>Sal09g12930L</i> | WRKY31  | AT4G22070.3   | 0.381665586                      | -0.737631153                     |
|      | <i>Sal11g08240L</i> | WRKY70  | AT3G56400.1   | 0.284754014                      | -0.95994111                      |
|      | <i>Sal11g12870L</i> | WRKY62  | AT5G01900.1   | -0.028512358                     | -0.637313551                     |
|      | <i>Sal11g27960L</i> | WRKY51  | AT5G64810.1   | 0.692989999                      | -1.04779108                      |
|      | <i>Sal12g15860L</i> | WRKY54  | AT2G40750.1   | 0.321408637                      | -0.779302514                     |
|      | <i>Sal12g15870L</i> | WRKY55  | AT2G40740.3   | 0.114783433                      | -0.967799833                     |
|      | <i>Sal01g33300L</i> | WRKY51  | AT5G64810.1   | 0.321471648                      | -0.97136528                      |
| MYB  | <i>Sal04g31480L</i> | MYB32   | AT4G34990.1   | 0.28143284                       | 0.716844411                      |
|      | <i>Sal06g24450L</i> | MYB65   | AT3G11440.3   | 0.203152121                      | 0.677810087                      |
|      | <i>Sal06g26780L</i> | MYB108  | AT3G06490.1   | 0.003955848                      | 1.272103125                      |
|      | <i>Sal10g15640L</i> | MYB56   | AT5G17800.1   | -0.158718689                     | 0.700026152                      |
|      | <i>Sal11g12840L</i> | MYB305  | AT3G24310.1   | 0.025904163                      | 1.000025335                      |
|      | <i>Sal11g19270L</i> | MYB45   | AT3G48920.1   | 0.01245687                       | 0.734811991                      |
|      | <i>Sal12g05270L</i> | MYB40   | AT5G14340.2   | 0.01358962                       | 0.669616788                      |
|      | <i>Sal12g08990L</i> | MYB59   | AT5G59780.3   | 0.903774003                      | 0.670602918                      |
|      | <i>Sal02g06750L</i> | MYB122  | AT1G74080.1   | 0.087399076                      | -0.685231714                     |
|      | <i>Sal02g06990L</i> | MYB95   | AT1G74430.2   | 0.183995267                      | -1.03068712                      |
|      | <i>Sal04g19620L</i> | MYB34   | AT5G60890.1   | -0.140085505                     | -1.212893513                     |
|      | <i>Sal05g06230L</i> | MYB51   | AT1G18570.1   | 0.568165198                      | -0.869440886                     |
|      | <i>Sal09g22460L</i> | MYB94   | AT3G47600.2   | 0.729727138                      | -0.998551314                     |
|      | <i>Sal10g21110L</i> | MYB88   | AT2G02820.3   | -0.106929796                     | -0.615358254                     |
|      | <i>Sal12g24330L</i> | MYB81   | AT2G26960.1   | -0.138874571                     | -0.798983795                     |
|      | <i>Sal01g13550L</i> | MYB73   | AT4G37260.1   | -0.179071643                     | 0.599154329                      |
| bHLH | <i>Sal06g27630L</i> | bHLH96  | AT1G72210.2   | 0.033846386                      | 0.640056287                      |
|      | <i>Sal03g11130L</i> | bHLH    | AT5G51780.2   | -0.026235253                     | -0.602038113                     |
|      | <i>Sal04g06080L</i> | bHLH92  | AT5G43650.2   | 0.291992944                      | -1.083547325                     |
|      | <i>Sal07g01190L</i> | bHLH017 | AT2G46510.1   | 0.329614275                      | -0.67708773                      |
|      | <i>Sal12g22990L</i> | bHLH029 | AT2G28160.2   | 0.179955981                      | -0.841626369                     |
|      | <i>Sal01g34110L</i> | bHLH093 | AT5G65640.2   | 0.144436609                      | 0.623194616                      |
| CAT  | <i>Sal04g24250L</i> | CAT1    | AT4G21120.2   | 0.630458451                      | 0.651238664                      |
|      | <i>Sal09g24930L</i> | CAT7    | AT1G50090.1   | 0.035580421                      | 0.955087571                      |
|      | <i>Sal05g07150L</i> | CAT3    | AT1G20620.7   | 0.046931768                      | -0.70896001                      |

|      |                     |        |             |              |              |
|------|---------------------|--------|-------------|--------------|--------------|
|      | <i>Sal08g06480L</i> | CAT2   | AT1G10070.2 | 0.3789437    | -0.714217328 |
|      | <i>Sal08g13780L</i> | CAT3   | AT1G20620.7 | 0.166475978  | -0.994906842 |
| Pro  | <i>Sal05g07420L</i> | PRO25  | AT1G21250.1 | -0.166508468 | 1.051896764  |
|      | <i>Sal02g33330L</i> | PRO2   | AT2G16650.2 | -0.165178409 | -0.695601386 |
| SOD  | <i>Sal02g03110L</i> | SOD1   | AT1G08830.2 | -0.42364719  | -0.642098622 |
| ABCA | <i>Sal06g23290L</i> | ABCA4  | AT3G47750.1 | 0.23292205   | 1.118856045  |
|      | <i>Sal09g22530L</i> | ABCA7  | AT3G47780.1 | -0.049055171 | 0.676516227  |
|      | <i>Sal07g07850L</i> | ABCA8  | AT3G47790.2 | 0.039290479  | -1.228588422 |
| ABCB | <i>Sal08g01080L</i> | ABCB11 | AT1G02520.2 | 0.128634795  | -0.837879287 |
|      | <i>Sal09g10000L</i> | ABCB2  | AT4G25960.1 | -0.268731066 | -0.81092096  |
| ABCC | <i>Sal02g24130L</i> | ABCC7  | AT3G13100.2 | 0.706111816  | -0.665304297 |
|      | <i>Sal05g10850L</i> | ABCC1  | AT1G30400.2 | 0.037519924  | -0.659901318 |
|      | <i>Sal07g18830L</i> | ABCC2  | AT2G34660.3 | 0.088614868  | -0.682198003 |
|      | <i>Sal08g27560L</i> | ABCC4  | AT2G47800.1 | 0.638220498  | -0.663210873 |
|      | <i>Sal02g15450L</i> | ABCC9  | AT3G60160.3 | 0.742256547  | -1.35929781  |

---
