# Supplementary material for: Integrative Physiological and Transcriptome Analysis Reveals the Mechanism of Cd Tolerance in Sinapis alba
Source: MDPI journal article supplement (doi:10.3390/genes14122224), 2023-12-16
Supplement: s1 [file s1]

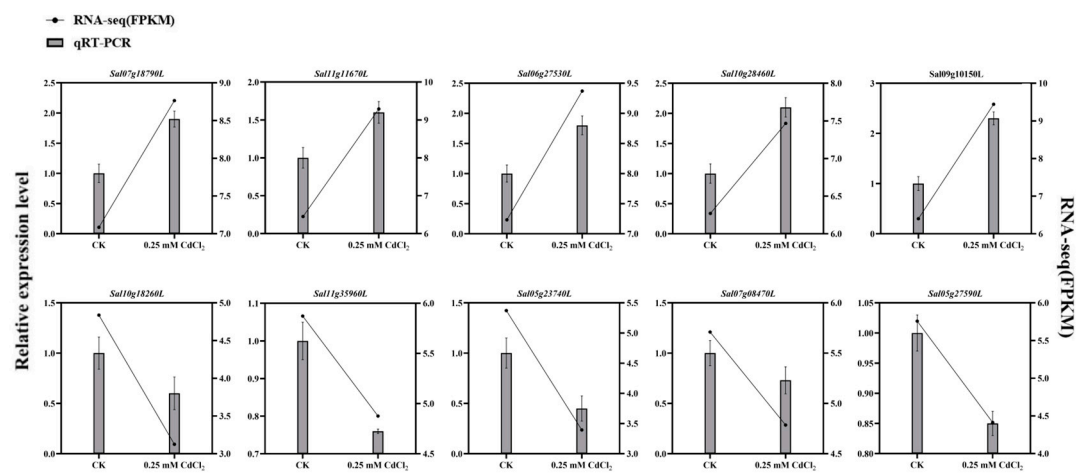

**Fig. S1.** qRT-PCR verification of the expression levels of 10 DEGs (five upregulated and five downregulated) determined by RNA-seq. The left y-axis represents the relative expression level, and the right y-axis represents RNA-seq (FPKM). The box with error bars indicates the qRT-PCR result, and the oblique line represents the FPKM value of gene expression.
